# Supplementary material for: Effects of Different Swimming Pool Conditions and Floor Types on Growth Performance and Footpad Dermatitis in Indoor-Reared White Roman Geese
Source: MDPI journal article supplement (doi:10.3390/ani11061705), 2021-06-07
Supplement: s1 [file s1]

**Table S1.** Investigation of footpad dermatitis data in Taiwan goose farms in 2017.

| Goose farm number | Location        | Feeding scale (birds) | Floor condition                              | Outdoor play-ground | Outdoor water pool | Slaughter age (days) | Market weight (kg) <sup>1</sup> | Footpad dermatitis score <sup>2</sup> | Incidence of footpad dermatitis (%) <sup>3</sup> |
|-------------------|-----------------|-----------------------|----------------------------------------------|---------------------|--------------------|----------------------|---------------------------------|---------------------------------------|--------------------------------------------------|
| 1                 | Yunlin County   | 300                   | Cement floor and muddy soil                  | yes                 | yes                | 96                   | 5.4                             | 0.1                                   | 10                                               |
| 2                 | Pingtung County | 275                   | Stone ground                                 | yes                 | yes                | 100                  | 5.4                             | 0.45                                  | 45                                               |
| 3                 | Chiayi County   | 540                   | Sandy soil                                   | yes                 | yes                | 96                   | 4.74                            | 0.55                                  | 48                                               |
| 4                 | Yunlin County   | 400                   | Sandy soil                                   | yes                 | yes                | 100                  | 5.04                            | 0.73                                  | 69                                               |
| 5                 | Pingtung County | 1000                  | Stainless perforated floors and Stone ground | yes                 | yes                | 96                   | 5.16                            | 0.75                                  | 62                                               |
| 6                 | Chiayi County   | 550                   | Muddy soil                                   | yes                 | yes                | 100                  | 5.52                            | 0.8                                   | 79                                               |
| 7                 | Pingtung County | 100                   | Sandy soil                                   | yes                 | yes                | 98                   | 5.46                            | 0.8                                   | 67                                               |
| 8                 | Chiayi County   | 125                   | Sandy soil                                   | yes                 | yes                | 96                   | 5.76                            | 0.83                                  | 71                                               |
| 9                 | Pingtung County | 350                   | Sandy soil                                   | yes                 | no                 | 99                   | 5.1                             | 1                                     | 86                                               |
| 10                | Chiayi County   | 250                   | Sandy soil                                   | yes                 | yes                | 101                  | 5.22                            | 1.01                                  | 67                                               |
| 11                | Yunlin County   | 500                   | Muddy soil                                   | yes                 | yes                | 96                   | 5.22                            | 1.12                                  | 89                                               |
| 12                | Chiayi County   | 250                   | Sandy soil                                   | yes                 | yes                | 100                  | 5.4                             | 1.18                                  | 93                                               |
| 13                | Pingtung County | 600                   | Stone ground                                 | yes                 | yes                | 96                   | 5.4                             | 1.22                                  | 93                                               |
| 14                | Yunlin County   | 150                   | Stone ground                                 | yes                 | no                 | 102                  | 5.16                            | 1.31                                  | 99                                               |

<sup>1</sup> The value represents the average weight of the feeding scale of geese. <sup>2</sup>Data sampled from 100 geese in each farm. <sup>3</sup>The value is calculated as the percentage of geese whose FPD score reaches 0.5 points or more.

**Table S2.** Composition of starter and grower diets.

| Ingredients                 | Starter<br>(0 to 28 d) | Grower<br>(29 to 84 d) |
|-----------------------------|------------------------|------------------------|
| Yellow corn                 | 61.60                  | 64.20                  |
| Soybean meal                | 29.00                  | 21.50                  |
| Wheat bran                  | -                      | 5.00                   |
| Rice hull                   | -                      | 3.00                   |
| Fish meal                   | 3.50                   | -                      |
| Molasses                    | 3.00                   | 3.00                   |
| Salt                        | 0.30                   | 0.30                   |
| Dicalcium phosphate         | 1.30                   | 1.60                   |
| Limestone, pulverized       | 0.70                   | 0.80                   |
| Choline chloride, 50 %      | 0.10                   | 0.10                   |
| DL-methionine               | 0.25                   | 0.20                   |
| Vitamin premix <sup>1</sup> | 0.10                   | 0.10                   |
| Mineral premix <sup>2</sup> | 0.15                   | 0.15                   |
| Total                       | 100                    | 100                    |
| Calculated values           |                        |                        |
| Crude protein, %            | 20                     | 15                     |
| ME, kcal/kg                 | 2,900                  | 2,800                  |

<sup>1</sup> Each kilogram contained the following: Vitamin A, 10,000,000 IU; Vitamin D<sub>3</sub>, 2,000,000 IU; Vitamin E, 20,000 g; Vitamin B<sub>1</sub>, 2 g; Vitamin B<sub>2</sub>, 5 g; Vitamin B<sub>6</sub>, 3 g; Vitamin B<sub>12</sub>, 0.03 g; Biotin, 0.2 g; Vitamin K<sub>3</sub>, 3 g; D-calcium pantothenate, 10 g; Folic acid, 2 g; Nicotinic acid, 30 g.

<sup>2</sup> Each kilogram contained the following: Cu, 15.0 g; Fe, 100 g; Zn, 50 g; Mn, 80 g; Co, 0.25 g; I, 0.85 g; Se, 0.15 g.
